# Supplementary material
Source: MDPI journal article supplement (https://www.mdpi.com/2073-445X/11/1/121)
Supplement: s1 [file s1]

## Supplementary materials

# To be, to Do, to Share: The Triple-Loop of Water Governance to Improve Urban Water Resilience—Testing the Benidorm' Experience, Spain

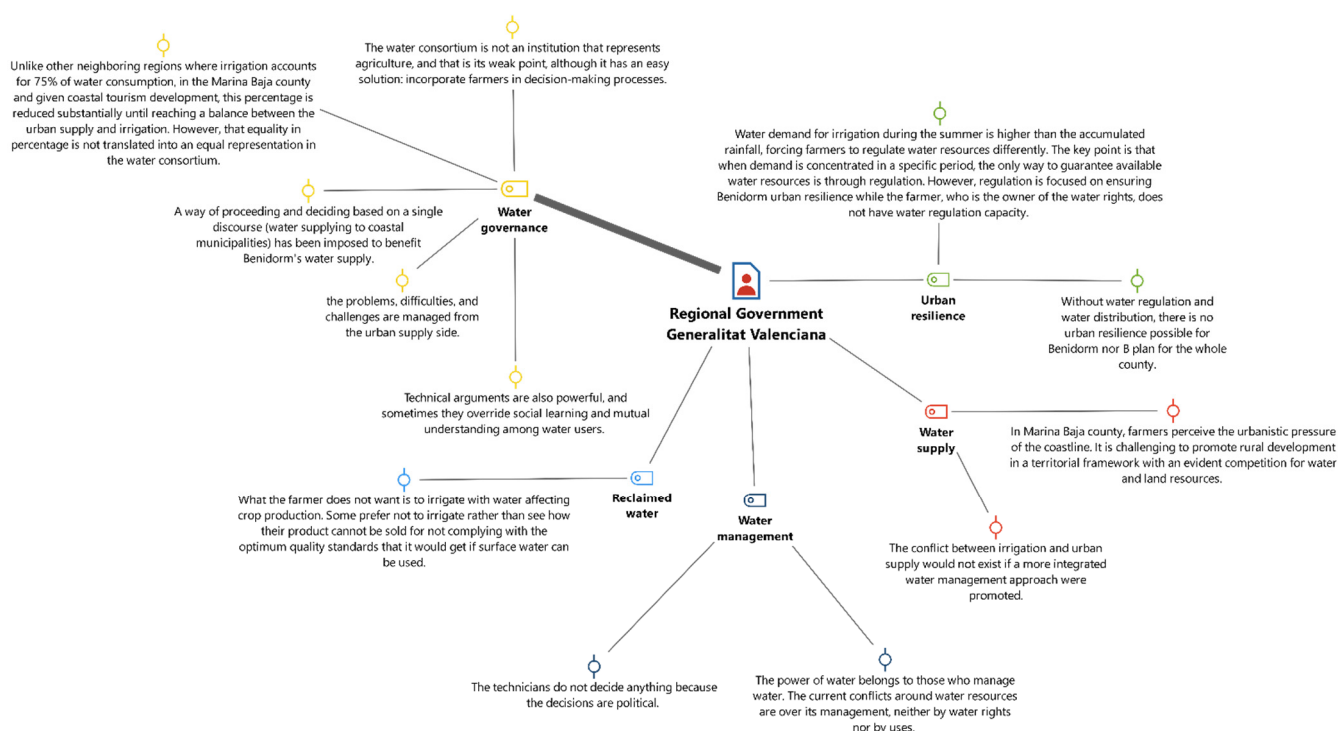

Figure S1. Regional Government – Generalitat Valenciana' narrative.

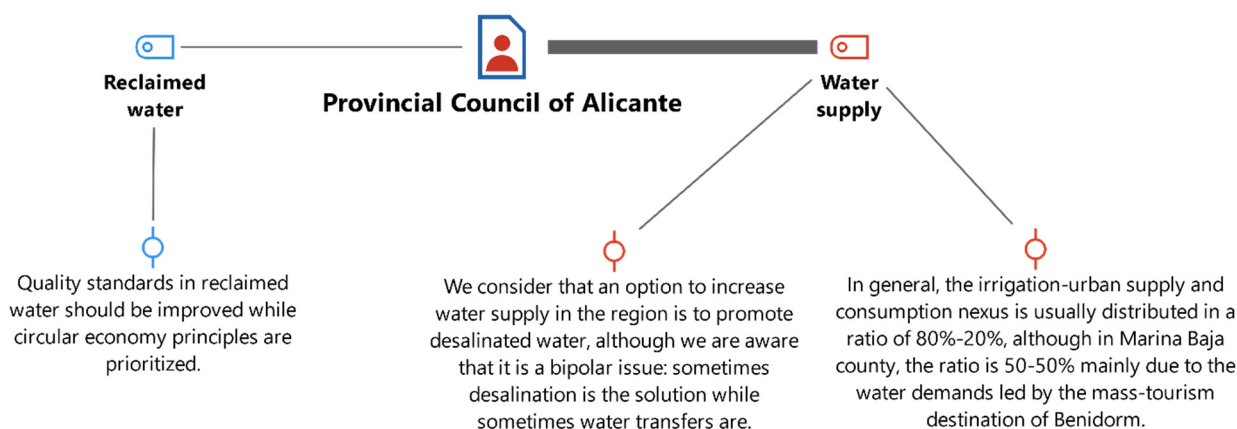

Figure S2. Provincial Council of Alicante' narrative.

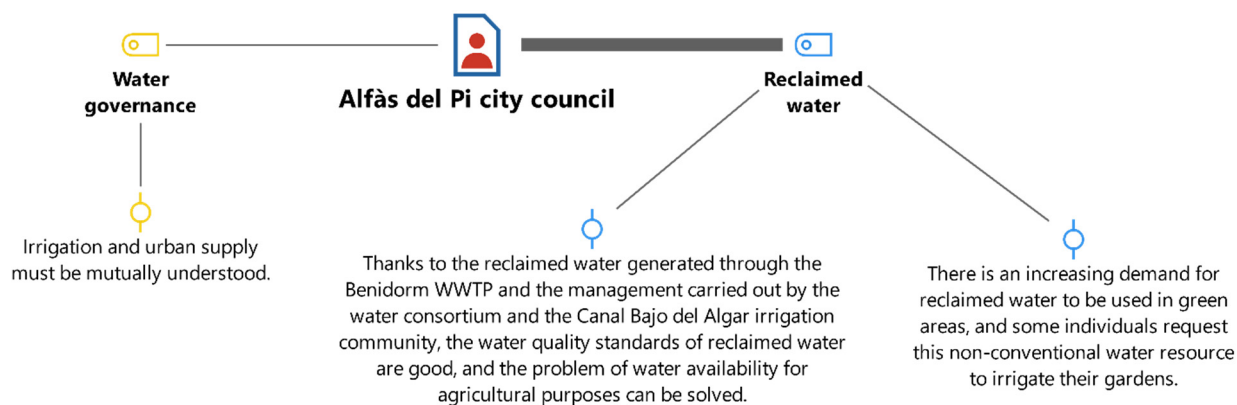

Figure S3. Alfàs del Pi city council' narrative.

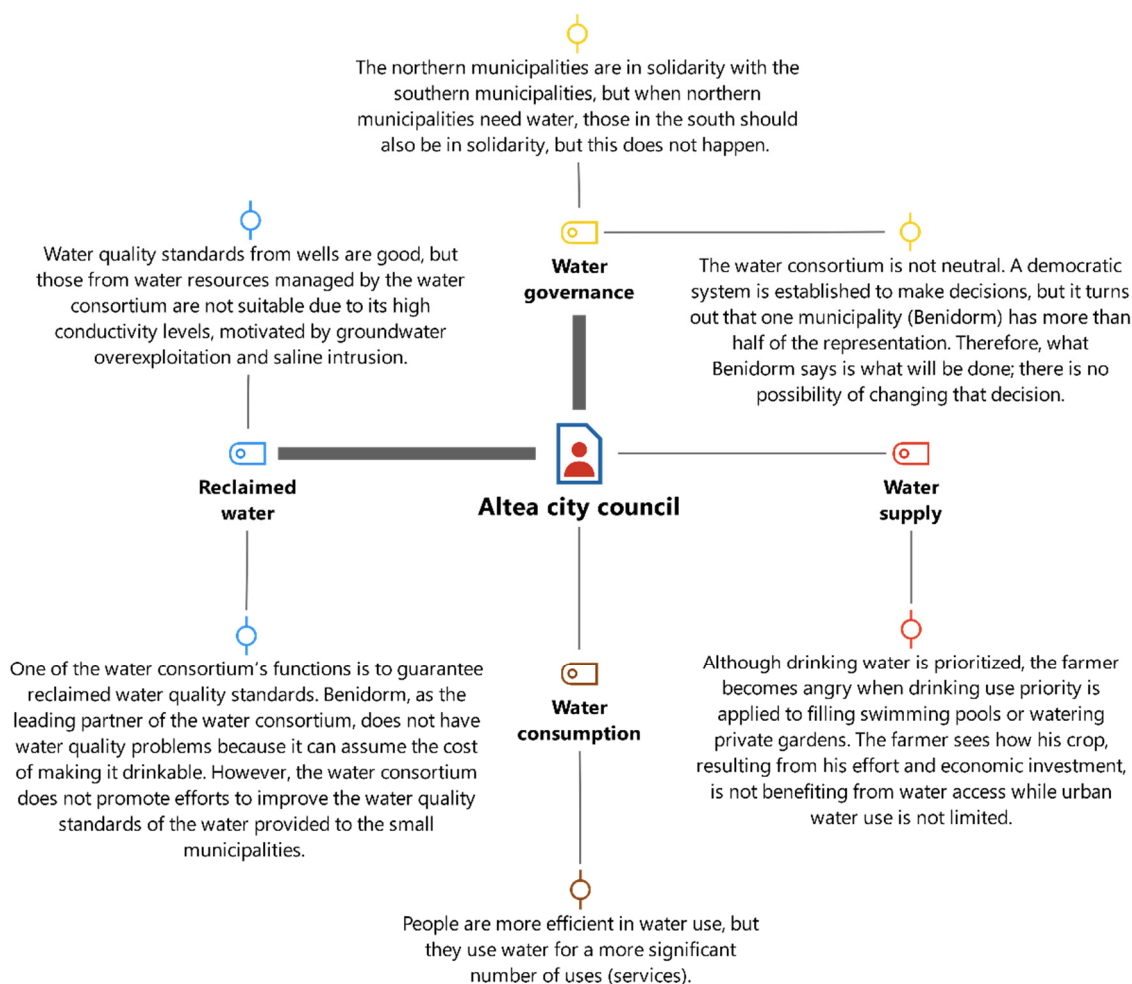

Figure S4. Altea city council' narrative.

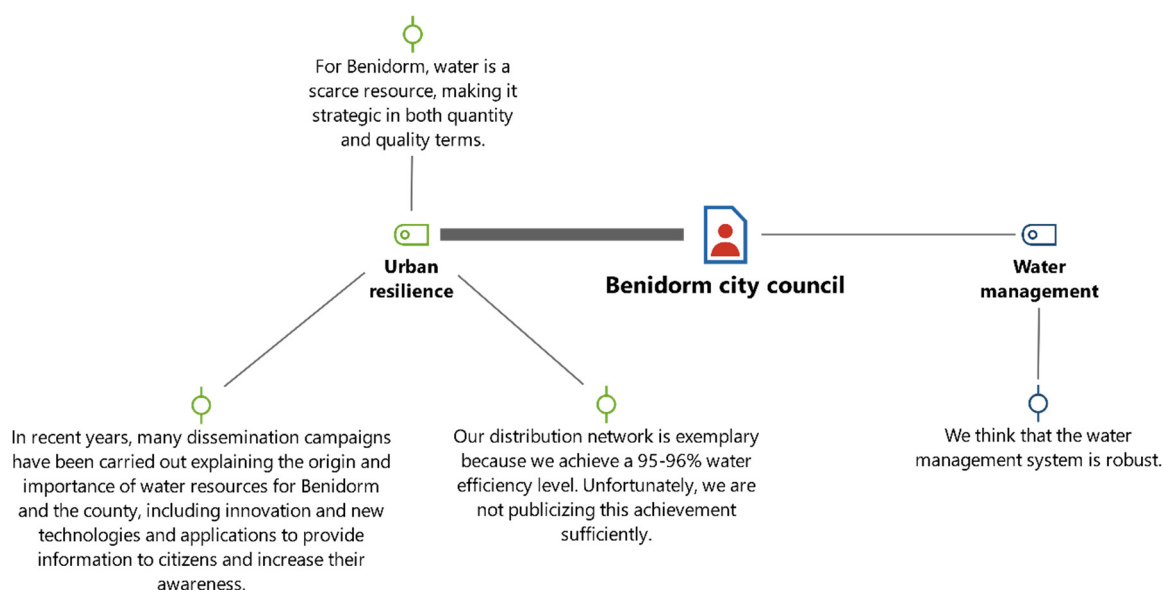

Figure S5. Benidorm city council' narrative.

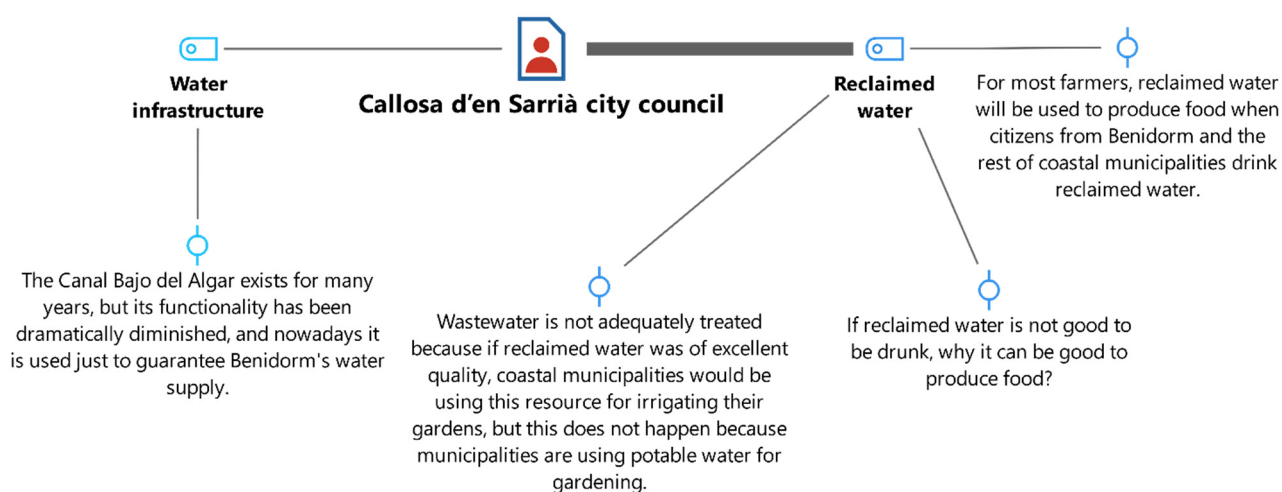

Figure S6. Callosa d'En Sarrià city council' narrative.

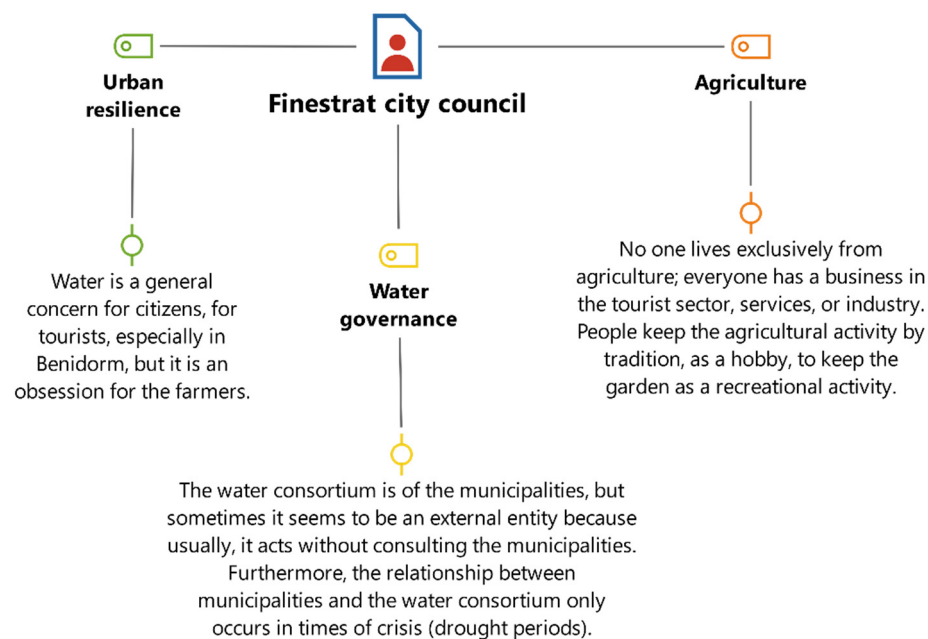

**Figure S7.** Finestrat city council' narrative.

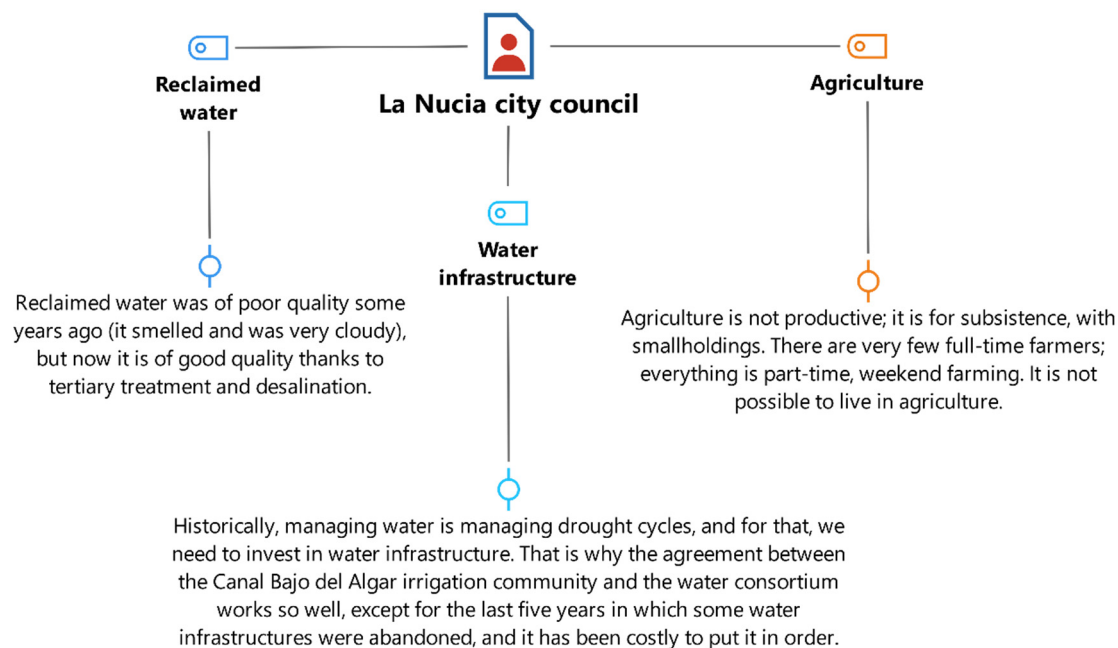

**Figure S8.** La Nucia city council' narrative.

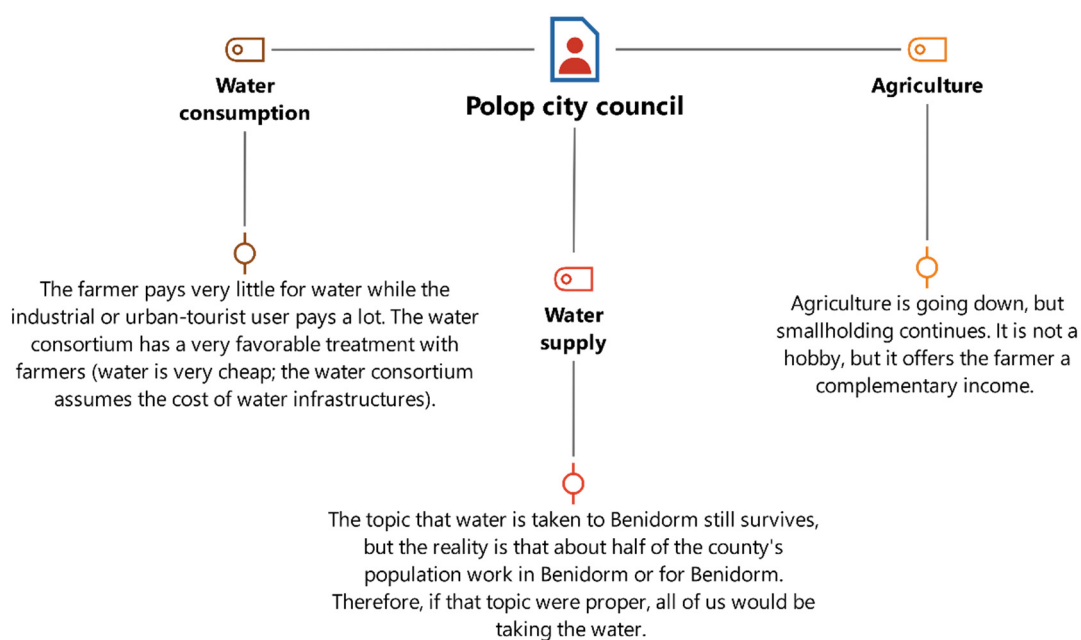

**Figure S9.** Polop city council' narrative.

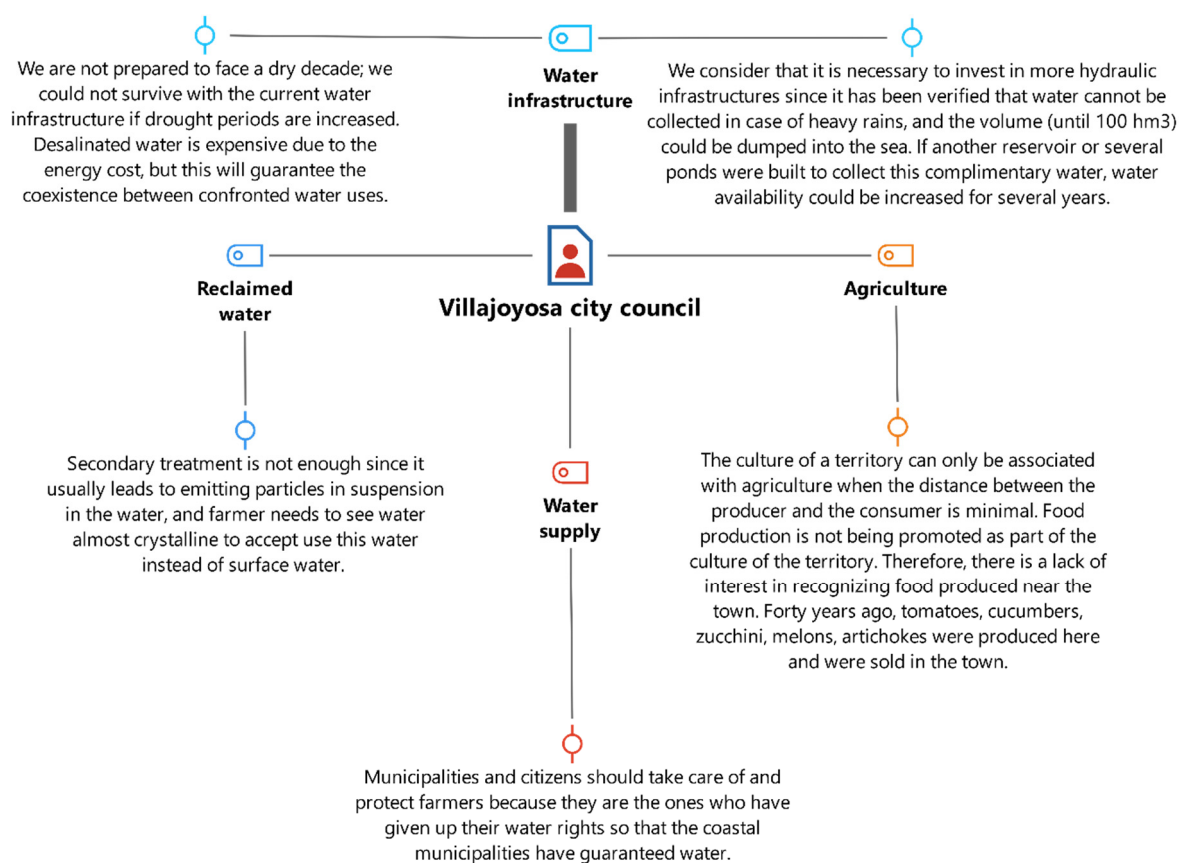

**Figure S10.** Villajoyosa city council' narrative.

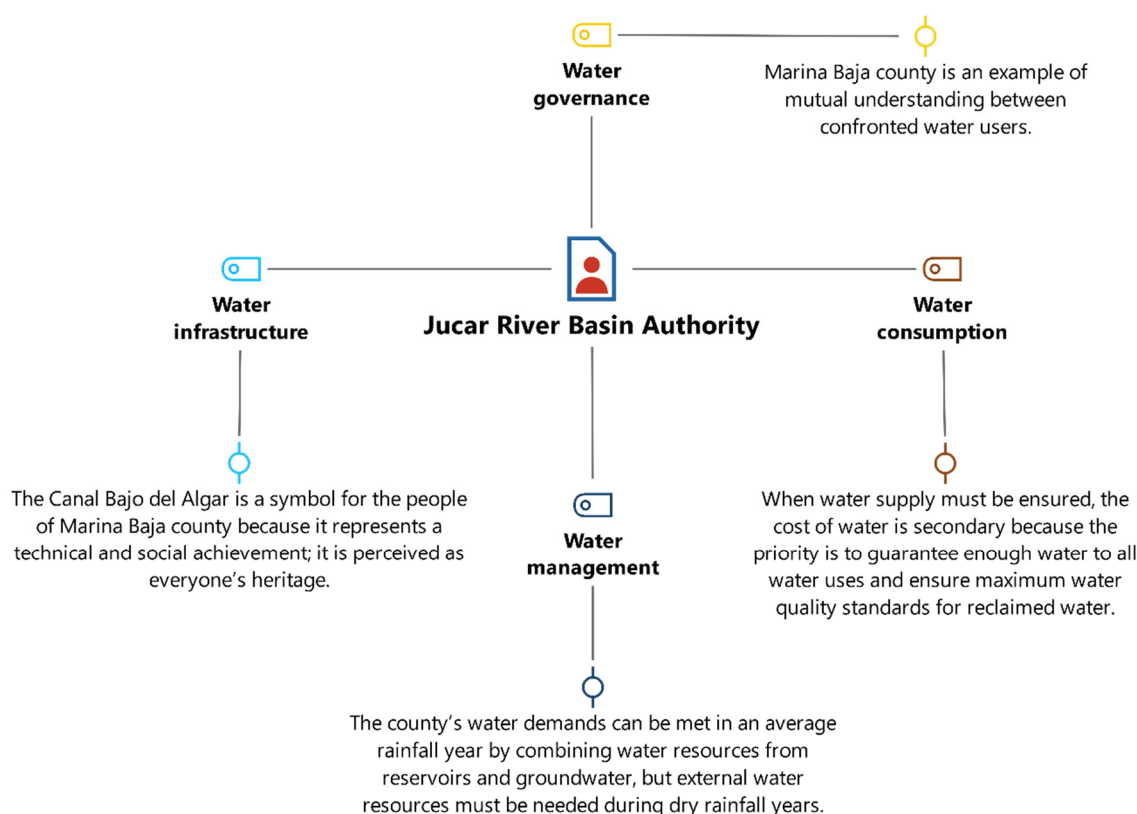

Figure S11. Jucar River Basin Authority' narrative.

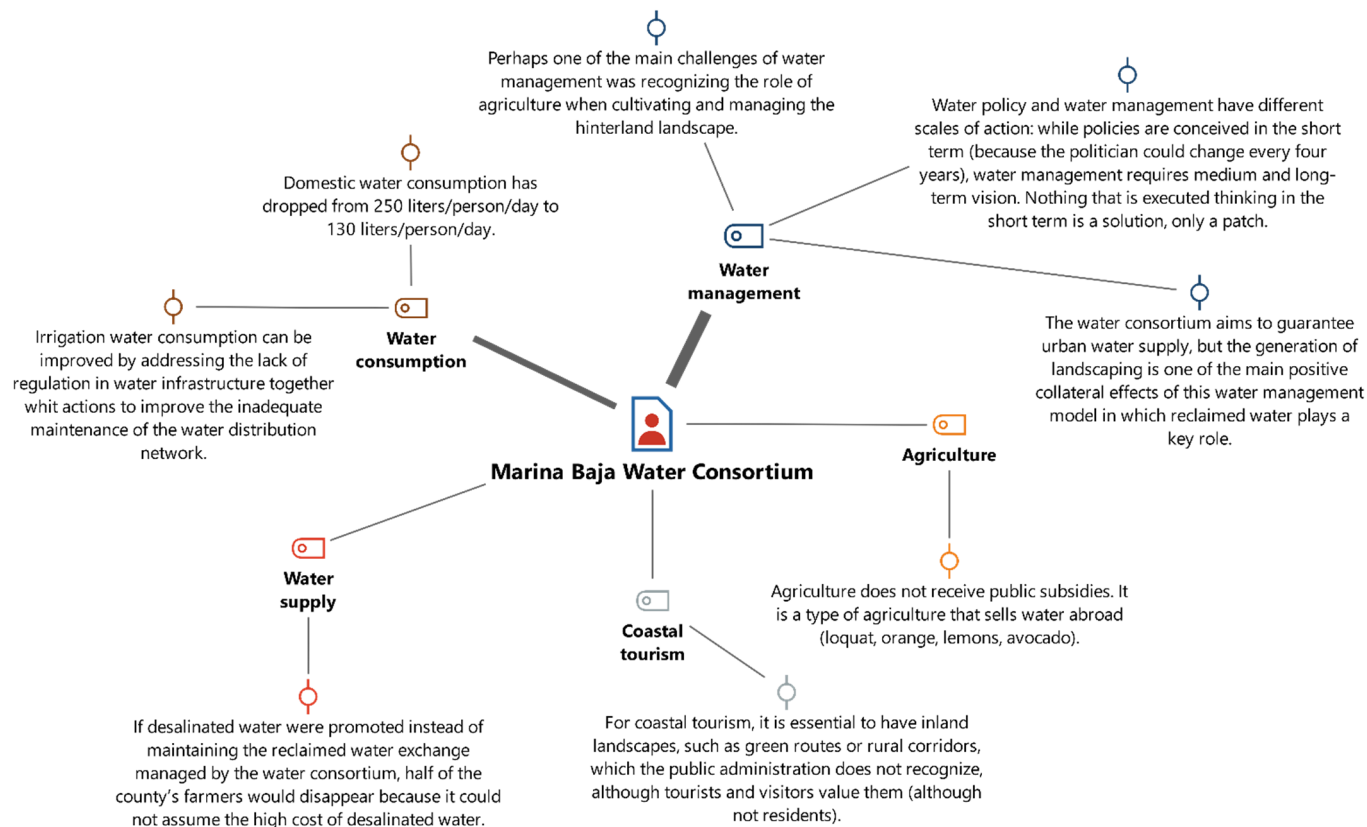

Figure S12. Marina Baja Water Consortium' narrative.



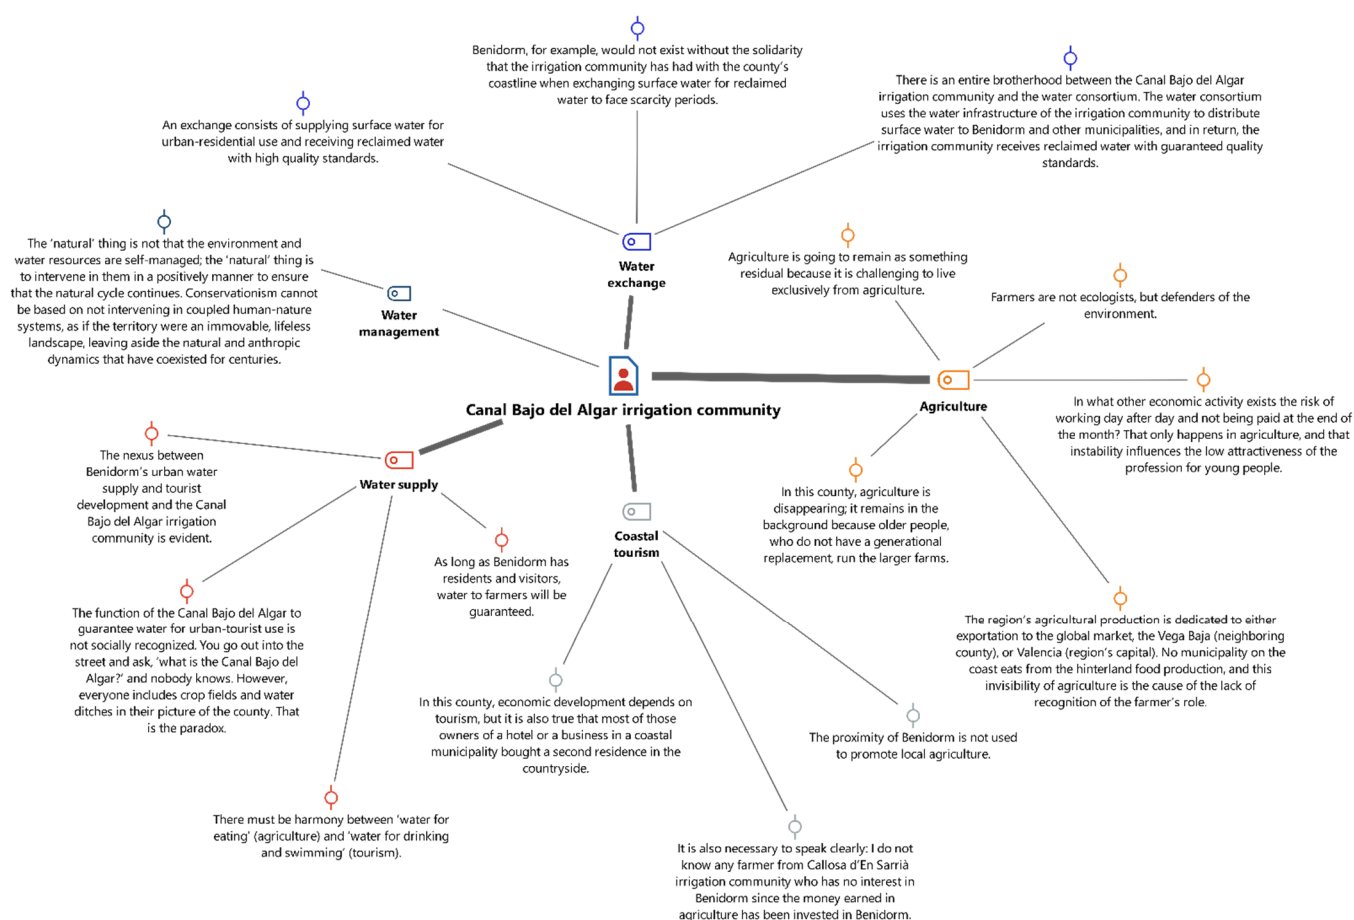

Figure S13. Canal Bajo del Algar irrigation community' narrative.

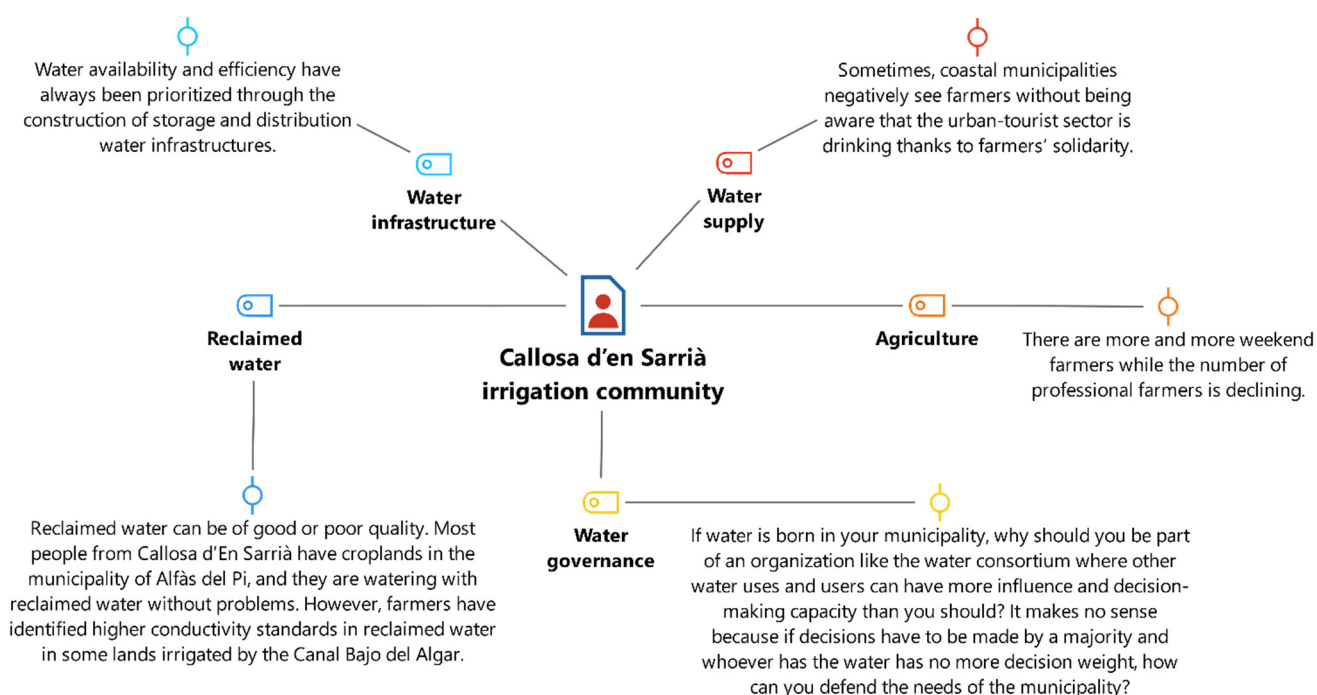

Figure S14. Callosa d'En Sarrià irrigation community' narrative.

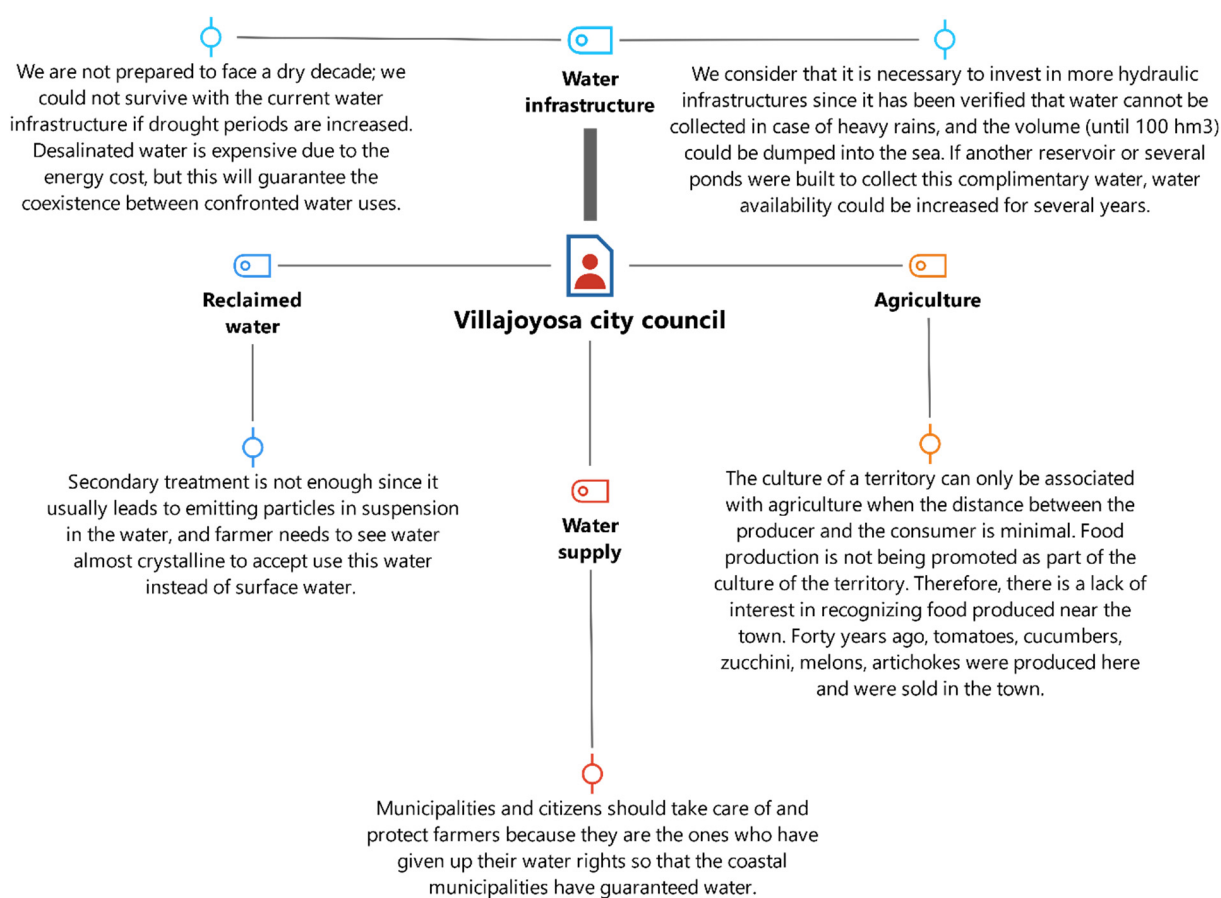

Figure S15. Villajoyosa irrigation community' narrative.

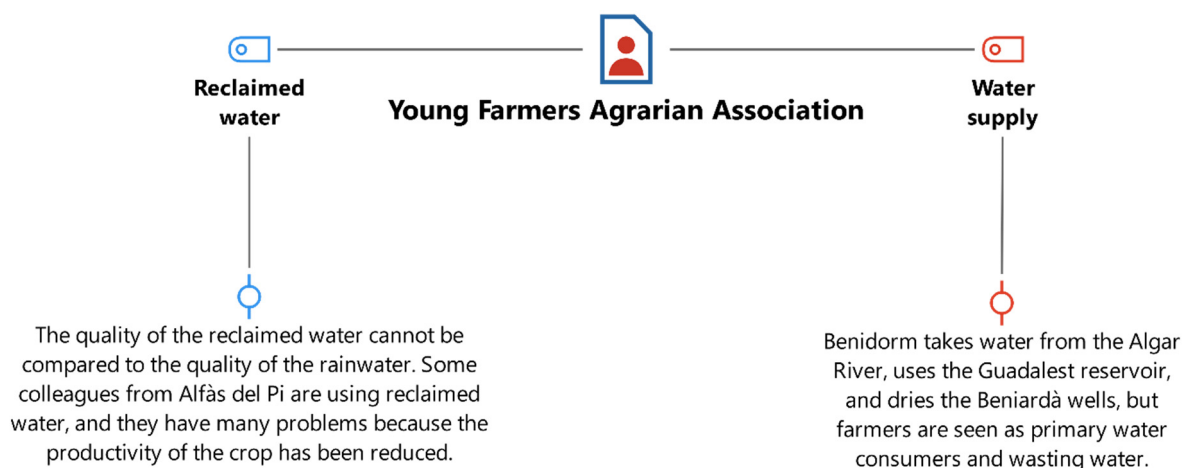

Figure S16. Young Farmers Agrarian Association' narrative.



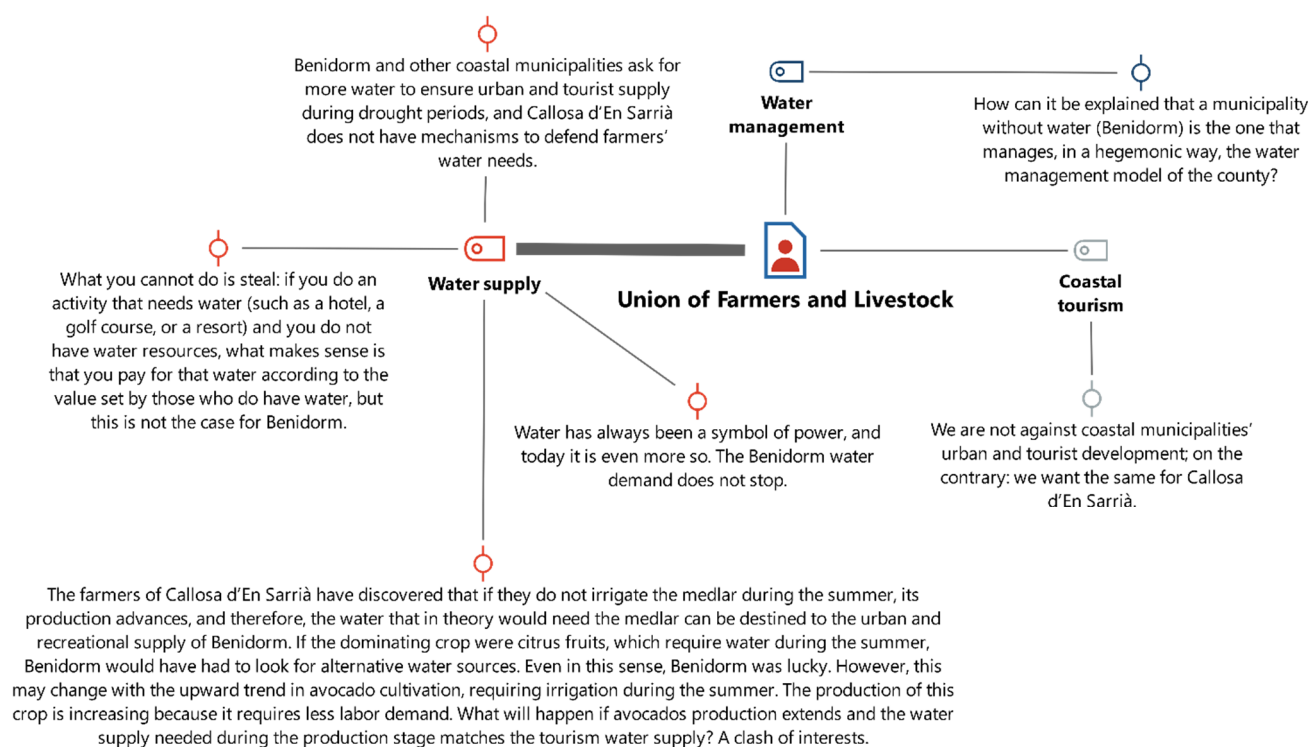

Figure S17. Union of Farmers and Livestock' narrative.

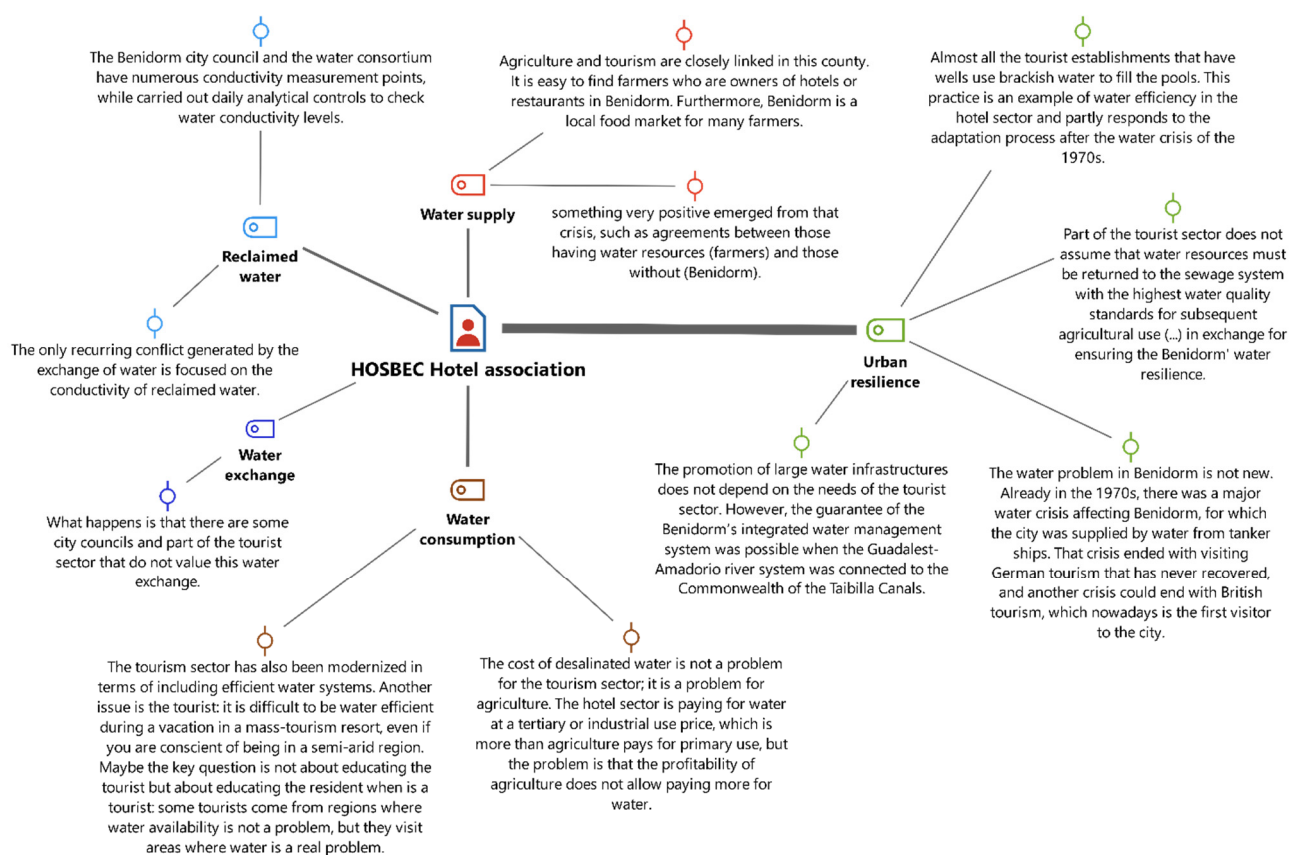

Figure S18. HOSBEC hotel association' narrative.

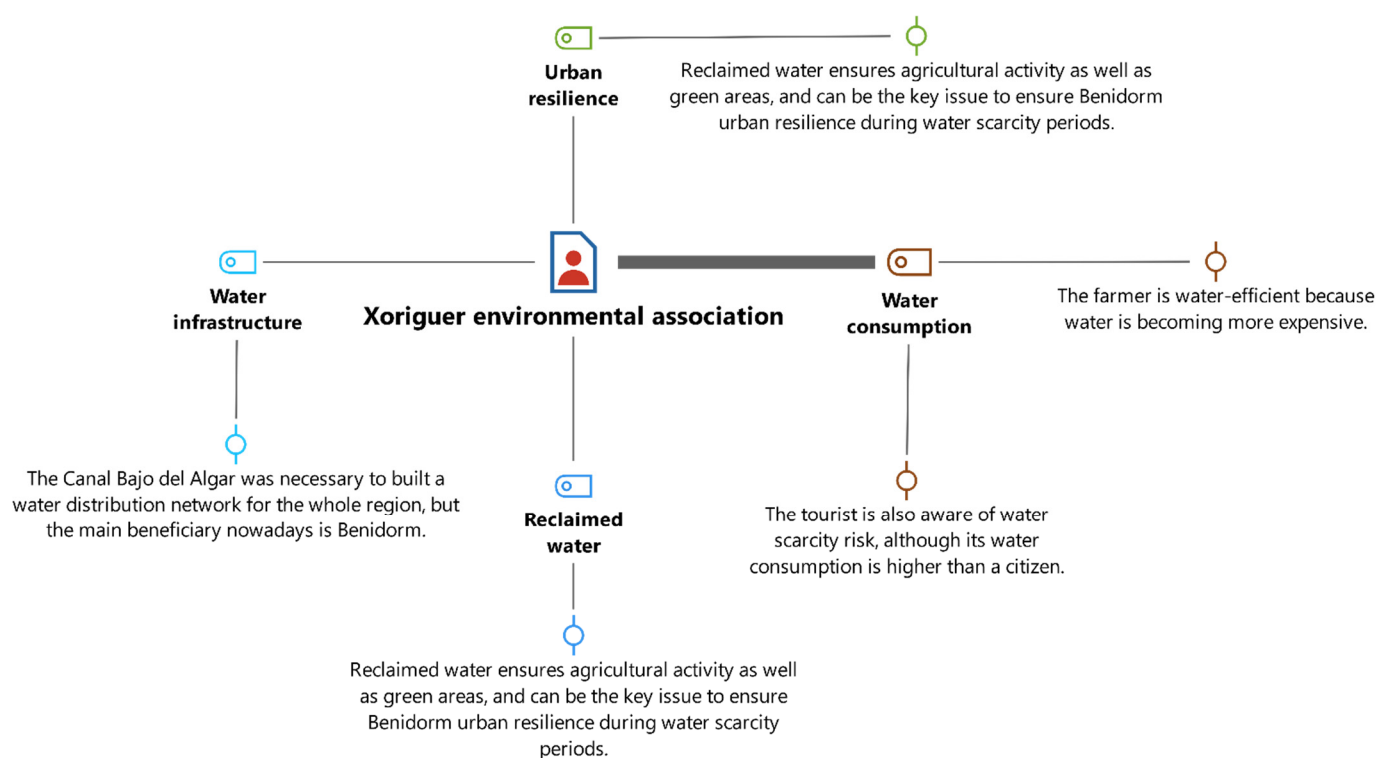

**Figure S19.** Xoriguer environmental association' narrative.
